1 **Development and application of eDNA-based tools for the conservation of white-**  
2 **clawed crayfish**

3

4 **Christopher R. Troth<sup>1,2\*</sup>, Alfred Burian<sup>1</sup>, Quentin Mauvisseau<sup>1,2</sup>, Mark Bulling<sup>1</sup>, Jen Nightingale<sup>3,4</sup>,**  
5 **Christophe Mauvisseau<sup>5</sup>, Michael J. Sweet<sup>1</sup>.**

6

7 <sup>1</sup> Aquatic Research Facility, Environmental Sustainability Research Centre, University of Derby, Derby, DE22 1GB, UK.

8 <sup>2</sup> SureScreen Scientifics Ltd, Morley Retreat, Church Lane, Morley, DE7 6DE, UK.

9 <sup>3</sup> Bristol Zoological Society, Clifton, Bristol, UK.

10 <sup>4</sup> School of Biological Sciences, University of Bristol, Bristol, UK.

11 <sup>5</sup> Fédération de Pêche et de Protection du Milieu Aquatique du Loir-et-Cher, 11 Rue Robert Nau, 41000 Blois, France.

12 \*Corresponding author: [c.troth@derby.ac.uk](mailto:c.troth@derby.ac.uk)

13

14 **Key words:** white-clawed crayfish, environmental DNA, validation, sampling methodology.

15 **Abstract**

16 eDNA-based methods represent non-invasive and cost-effective approaches for species monitoring and  
17 their application as a conservation tool has rapidly increased within the last decade. Currently, they are  
18 primarily used to determine the presence/absence of endangered species, but they also hold the potential  
19 to contribute to an improved understanding of the complex ecological interactions that drive species  
20 distribution. However, this next step of eDNA-based applications requires a thorough method  
21 development. In this study, we a developed an eDNA assay for the white-clawed crayfish  
22 (*Austropotamobius pallipes*), a flagship species of conservation in the UK. Multiple subsequent *in-situ* and  
23 *ex-situ* validation tests aimed at improving method performance allowed us to apply eDNA-based surveys  
24 to evaluate interactions between white-clawed crayfish, crayfish plague (*Aphanomyces astaci*) and the  
25 invasive signal crayfish (*Pacifastacus leniusculus*). The assay performed well in terms of specificity (no  
26 detection of non-target DNA) and sensitivity, which was shown to be higher than current and more  
27 established survey methods. Quantification of species biomass was, however less reliable. Yet the eDNA  
28 assay equalled results achieved with the traditional methods. Comparison of eDNA sampling methods  
29 (precipitation vs. various filtration approaches) revealed that the optimal sampling method differed across  
30 environments and might depend on inhibitor concentrations. Finally, we applied our methodology  
31 together with established assays for crayfish plague and the invasive signal crayfish and demonstrated  
32 their significant interactions in a U.K. river system. Overall, our analysis highlights the importance of  
33 thorough methodological development of eDNA-based assays. Only a critical evaluation of  
34 methodological strengths and weaknesses will allow us to capitalise on the full potential of eDNA-based  
35 methods and use them as decision support tools in environmental monitoring and conservation practices.

## 36 **Introduction**

37 Since its initial conception as a method for aquatic ecological surveys (Ficetola et al., 2008), the use of  
38 environmental DNA (eDNA) based methods are rapidly increasing in popularity (Biggs et al., 2015; Harper  
39 et al., 2019; Jerde et al., 2013; Spear et al., 2015). Advantages such as higher cost effectiveness compared  
40 to established survey techniques and the non-invasive sampling approach have been excessively  
41 emphasised (Goldberg et al., 2016; Huver et al., 2015; Rees et al., 2014; Takahara et al., 2012).  
42 Nevertheless, the true potential of eDNA-based methods is just starting to be realized. Currently, eDNA-  
43 based tools are mostly used for simple presence/absence surveys, while they could also be used to study  
44 complex ecological interactions that determine species distribution and the conservation status of target  
45 species. However, such advances in application require careful method evaluations and the improvement  
46 of sampling approaches to increase reliability of detection and prevent false conclusions.

47 In the case of species-specific eDNA assays, the design and validation of the assay represents a critical first  
48 step (Geerts et al., 2018; Rees et al., 2014). During assay design, it is fundamental to ensure a high target  
49 specificity (Bylemans et al., 2018) by selecting suitable amplicon lengths, *in-silico* simulations and testing  
50 against amplification of non-target DNA. *In-vitro* laboratory validation should then ascertain that the assay  
51 complies with established guidelines (Bustin et al., 2009) and that limits of detection (LOD) and  
52 quantification (LOQ) are established. Further, field comparisons with established survey methods are  
53 recommended to complement reliability assessments (Smart et al., 2015). However, both traditional  
54 survey approaches and eDNA-based methods are affected by various error sources potentially creating  
55 inconsistencies that require careful interpretation (Hinlo et al., 2017a).

56 Further, the reliability of eDNA-based tools is strongly influenced by sampling methodology (Hinlo,  
57 Gleeson, *et al.*, 2017). Currently, precipitation and various filtration methods are applied to concentrate

58 eDNA during field sampling. Filtration approaches have the advantage of collating eDNA from larger  
59 volumes of water compared to precipitation-based methods (Mächler et al., 2016). However, they are  
60 also incorporate the risk of missing particles below the filter pore size (Minamoto et al., 2016) and may  
61 lead to higher concentrations of inhibitors preventing targeted eDNA amplification (Mauvisseau et al.,  
62 2019a). Previous method comparisons have come to contrasting recommendations for difference species  
63 (Rees *et al.*, 2014; Deiner *et al.*, 2015; Dickie *et al.*, 2018). Additionally, even for the same species the  
64 ‘optimal’ method for collecting eDNA may vary between lentic (i.e. ponds or lakes) and lotic (i.e. rivers  
65 and canals) systems (Geerts et al., 2018; Harper et al., 2019) and therefore careful method comparisons  
66 are recommended (Deiner et al., 2015).

67 In this study, we target the white-clawed crayfish, *Austropotamobius pallipes* (Lereboullet, 1858), an  
68 endangered and important umbrella species in the U.K. and Western Europe (Füreder et al., 2010). Range  
69 reduction of *A. pallipes* began in the 1860s, with declines rapidly accelerating in the UK after the  
70 introduction of invasive crayfish (*Pacifastacus leniusculus*, Dana, 1852) from north America in the 1970s  
71 (Holdich et al., 2009). Moreover, the spread of crayfish plague *Aphanomyces astaci* (Schikora 1906), an  
72 oomycete pathogen carried by the invasive crayfish, has greatly exacerbated the negative impact of  
73 invasive competitors, pollution and habitat degradation (Holdich et al., 2009). Despite its legislative  
74 protection (EU Habitats Directive), *A. pallipes* has continued to decline by as much as 50-80% over the last  
75 decade (Füreder et al., 2010). Due (at least in part) to the now rarity of the native species, traditional  
76 survey methods are having unsatisfactory success in monitoring populations (Gladman et al., 2010;  
77 Holdich and Reeve, 1991), highlighting the urgent need of develop new survey tools.

78 Consequently, the aim of this study was to develop a highly reliable eDNA assay for the detection of *A.*  
79 *pallipes*, that allows the assessment of interactions with competing species and parasites which threaten  
80 their survival. Thereby, ultimately determining the drivers of the distribution of all three species. We

81 designed a primer set for the amplification of *A. pallipes* DNA and critically evaluated the sensitivity and  
82 specificity of the assay through extensive *in-silico*, *in-vitro* and *in-situ* tests. Moreover, we evaluated the  
83 impact of different sampling methodologies on the reliability of the assay in mesocosm experiments and  
84 field tests implemented in different habitat types. Finally, this allowed us to assess in a U.K. river system  
85 the relationship between white-clawed crayfish, signal crayfish and crayfish plague, demonstrating the  
86 applicability of eDNA-based approaches for in-depth ecological investigations and ecosystem  
87 management.

88

## 89 **Materials and Methods**

### 90 ***Primer design and in-silico tests***

91 Primer/probe design and validation followed guidelines established by MacDonald and Sarre (2017) aimed  
92 for assay development of species-specific eDNA methods. The primers and probe, targeting the  
93 Cytochrome C Oxidase Subunit 1 (COI) mitochondrial gene of *A. pallipes*, were designed *in-silico* using the  
94 Geneious Pro R10 Software (Kearse et al., 2012). The forward primer WC2302F 5' -  
95 GCTGGGATAGTAGGGACTTCTTT - 3', reverse primer WC2302R 5' - CATGGGCGGTAACCACTAC - 3' and  
96 probe WC2302P 5' - 6-FAM-CTGCCCGCTGCCCTAATTC-BHQ-1 -3' amplified a 109bp fragment. To ensure  
97 specificity, *in-silico* tests were run against published sequences of closely related and/or co-occurring  
98 crayfish species.

### 99 ***In-vitro validation***

100 The specificity of the assay was further tested *in-vitro* against extracted DNA of either taxonomically  
101 similar, or co-occurring crayfish species. These included; *Faxonius limosus* (Rafinesque, 1817), *Pacifastacus*  
102 *leniusculus* (Dana, 1952), *Astacus astacus* (Linnaeus, 1758), *Astacus leptodactylus* (Eschscholtz, 1823),

103 *Procambarus clarkii* (Girard, 1852), and *Procambarus virginalis* (Lyko, 2017). DNA was extracted from  
104 crayfish tissues using the Qiagen DNeasy® Blood & Tissue kit, following manufacturers' instructions. PCRs  
105 were performed using the primers and methods from Folmer et al. (1994) and sequenced by Eurofins  
106 Genomics (Germany) to confirm species identify of all specimens. Specificity of the newly designed assay  
107 was then assessed using qPCR.

108 The reactions for both tissue and all eDNA samples contained; 12.5µL TaqMan® Environmental Master  
109 Mix 2.0 (Life Technologies®), 6.5µL DH<sub>2</sub>O, 1µL (10µm) of each primer, 1µL (2.5µm) of probe with the  
110 addition of 3µL template DNA. qPCR's were performed with 6 technical replicates (i.e. qPCR replicates) of  
111 each sample on a StepOnePlus™ Real-Time PCR System (Applied Biosystems). qPCR conditions were as  
112 follows: 50°C for 5 min, denaturation at 95°C for 8 min, followed by 50 cycles of 95°C for 30 s and 55°C for  
113 1 min. Six no template controls (NTC's) were prepared using RT-PCR Grade Water (Ambion™) alongside a  
114 duplicated serial dilution of control *A. pallipes* DNA (10<sup>-1</sup>-10<sup>-3</sup> ng µL<sup>-1</sup>) for each qPCR plate that was run.

#### 115 ***Limits of detection (LOD) and quantification (LOQ)***

116 The reliability of our assay was also assessed, following the Minimum Information for Publication of  
117 Quantitative Real-Time PCR Experiments (MIQE) Guidelines, which recommend the establishment of a  
118 calibration curve to determine LOD and LOQ (Bustin et al., 2009). We prepared a serial dilution of DNA  
119 extracted from *A. pallipes* starting from 0.79ng µL<sup>-1</sup> to 7.9x10<sup>-8</sup> ng µL<sup>-1</sup> with 10 qPCR replicates per dilution  
120 analysed. The LOD was defined as the last standard dilution that resulted in a detection of target DNA  
121 with at least one qPCR replicate at a threshold cycle (Ct) of <45. The LOQ was defined as the last standard  
122 dilution in which targeted DNA was detected and quantified in a minimum of 90% of qPCR replicates of  
123 the calibration curve under a Ct of 45 (Mauvisseau et al., 2019b).

#### 124 ***In-situ validation***

125 The reliability of the assay was further field tested by comparing eDNA-based and traditional capture-  
126 mark-recapture sampling techniques at six sites of confirmed *A. pallipes* presence (2017) in the Centre-  
127 Val de Loire region, France. Each site was visited at least twice in subsequent nights between 22<sup>nd</sup> June  
128 and 1<sup>st</sup> of August 2018 (see supplementary information, Table S1). Individual *A. pallipes* were surveyed  
129 using a torching approach, counted and marked using a white waterproof marker stain. In the second  
130 night the survey was repeated and marked, and non-marked crayfish were differentiated. Population size  
131 was estimated using the Lincoln-Petersen Method  $N = \left(\frac{Kn}{k}\right)$ , where N is the estimated population size, n  
132 is the number of crayfish marked on the 1<sup>st</sup> visit, K is the total number captured on the 2<sup>nd</sup> visit and k is  
133 the number of those captured individual which were already marked on the 2<sup>nd</sup> visit. (Petersen 1896,  
134 Lincoln 1930). Additionally, eDNA samples (two natural replicates, i.e. true environmental replication)  
135 were collected at each site using the 0.22 $\mu$ m Sterivex filters (see below for detailed description). eDNA  
136 samples were collected between the 22<sup>nd</sup> and 29<sup>th</sup> June 2018. The water volume filtered varied due to  
137 cases of high turbidity (consistent minimum volume of 150mL, see Table S2 for list of all sample volumes).  
138 Furthermore, additionally to the method below, eDNA filters were fixed with 2mL of ethanol to  
139 accommodate for the longer storage and transport time between the field and the laboratory. All sampled  
140 locations are part of an extensive monitoring programme for *A. pallipes* population studies and due to  
141 conservation reasons, locations of sites are not reported. The water temperature, environmental variables  
142 and the volume of sample filtered for eDNA samples (varied due to variable turbidity) were recorded at  
143 each site.

#### 144 ***Comparison of eDNA sampling methodologies in mesocosms***

145 Further, our aim was to assess the impact of eDNA sampling methodology on both the probability of eDNA  
146 detection and the signal strength (i.e. Ct) of its detection. We tested differences between the most

147 common eDNA sampling methods utilised to date, including (i) ethanol precipitation (Biggs et al., 2015),  
148 (ii) 2µm pump-based filtration (Strand et al., 2014), (iii) 0.45µm pressure filtration and (iv) 0.22µm  
149 pressure filtration (Spens et al., 2017). All methods were assessed in two mesocosms, housed at Bristol  
150 Zoological Gardens, Bristol, UK during autumn 2018. Both mesocosms were designed to the same  
151 specifications but contained different water volumes and crayfish numbers. Mesocosm 1 had a volume of  
152 3000L and contained 249 individual adult *A. pallipes* and sub-adults (between 17 months and four years  
153 old) with a total biomass of 1.3kg. Water parameters of mesocosm 1 were; pH 8, temperature 11°C, and  
154 under natural light conditions. Mesocosm 2 contained a volume of 1000L of water with the same pH (8)  
155 but with higher water temperatures (16°C) and under artificial light conditions. This mesocosm held a  
156 larger number of crayfish (379) but all were juvenile (five months old). The sensitivity of juveniles to  
157 handling did not allow us to obtain the exact biomass of this mesocosm, but biomass was estimated as  
158 250g. Both mesocosms were set up as recirculating ‘flow through filtration systems’, ensuring high water  
159 quality at all times. Six samples for each method and mesocosm combination were collected from both  
160 mesocosms.

161 In brief; eDNA samples classified hereafter as ‘precipitation’ samples were collected following the protocol  
162 outlined in Biggs et al. (2014). 1L of water (20 x 50mL subsamples) was collected from ~20cm below the  
163 surface and after homogenization, a subsample of 90 mL (6x 15mL) was aliquoted into sterile tubes  
164 containing a pre-mixed buffer solution (Biggs et al., 2014). Samples were stored at -20°C prior to extraction  
165 and extracted following Tréguier et al. (2014).

166 eDNA samples collected with a 2µm pump-based filtration consisted of 2L of water collated by the same  
167 sub-sample method outlined above but were then filtered through a Millipore Glass fibre filter AP25,  
168 47mm (2µm pore size) using a peristaltic pump (Masterflex E/S Portable Sampler, Cole-Parmer, USA). The  
169 filter was housed in an In-Line Filter Holder 47mm (Merck) connected by silicone tubing. The combined



170 use of a peristaltic pump and a larger filter pore size allowed us to substantially increase the amount of  
171 water filtered. The filter was then removed from the pump system and stored at -20°C before extraction.  
172 Equipment was soaked and cleaned with 10% bleach between samples. Filters were extracted following  
173 Spens et al. (2017). eDNA sample collections for 0.22µm and 0.45µm pressure filtration were undertaken  
174 in the same manner. 20 sub-samples were collected and collated and a 50mL syringe (BD Plastipak™,  
175 Ireland) was then used to pressure filter 250mL of water through a sterile enclosed filter (Sterivex™,  
176 Merck®, Germany) with either a pore size of 0.22µm (Polyethersulfone membrane) or 0.45µm  
177 (Polyvinylidene fluoride membrane). All filters were stored at -20°C, and extracted following Spens et al.  
178 (2017).

#### 179 ***In-situ comparison of eDNA sampling methodologies***

180 Complementary to the tests in the mesocosm experiment, we also evaluated sampling methodologies  
181 under natural conditions. However, we performed only pairwise method comparisons in order to contain  
182 sampling effort in the field. As a test in a lentic system, eDNA samples were collected from a 1000m<sup>2</sup> pond  
183 in the South West of England after the release of 40 *A. pallipes* individuals (equal juvenile-adult and male-  
184 female ratios, total biomass of 436g). Here, precipitation (sample volume: 90mL) was compared against  
185 0.22µm pressure filtration (sample volume: 250mL). Sampling started on the 20<sup>th</sup> April 2018 and was  
186 repeated two hours, seven days, 14 days and 35 days after crayfish release. At each sampling time, three  
187 natural replicates were taken from four 4 sites around the pond for each method. Additionally, 20 50mL  
188 sub-samples taken from the entire pond perimeter were pooled, homogenised and sampled with 3  
189 natural replicates per method.

190 Our second field test was conducted in a lotic system. We sampled 10 sites (situated approx. 1km apart)  
191 along a chalk stream river in Dorset (UK), during September 2017, and 4 sites along a river in Derbyshire

192 (UK). Here, ethanol precipitation was used in comparison to pump-based filtration (2 $\mu$ m, sample volume:  
193 2L), using three natural replicates at each site per method ( $n = 42$ ). Samples collected in the river system  
194 (20 pooled sub-samples as described above) were taken in an interval of 1-2m along a diagonal  
195 downstream-to-upstream transect across the river. In this field test, we also assessed the ability to screen  
196 for crayfish plague using both sampling methods. qPCRs in this instance were run using the primers and  
197 probe developed by Strand et al. (2014).

### 198 **Field test of white-clawed crayfish, signal crayfish and crayfish plague co-existence**

199 Finally, we assessed the distribution of white-clawed crayfish, signal crayfish and crayfish plague in a river-  
200 system in Derbyshire (UK). Two natural replicates were taken at each of eight sites along the river in  
201 November 2017. Six of these sites were located in proximity to the inflow of tributaries and two natural  
202 replicates were taken before and after their confluence to capture the influence of populations potentially  
203 present within tributaries (supplementary information, Fig. S1). The other two sites were sampled with  
204 two natural replicates. Sampling was conducted using the precipitation method outlined above and water  
205 samples were tested for the occurrence of all three species. Protocols of Mauvisseau *et al.*, (2018) for  
206 signal crayfish and of Strand *et al.*, (2014) for crayfish plague were applied.

### 207 **Statistical Analysis**

208 Samples measured for the establishment of a standard curve were analysed using a linear regression to  
209 evaluate the relationship between DNA concentration and Ct. A log-log data transformation decreased  
210 the models Akaike Information Criterion (AIC) and was therefore used for downstream analyses. Residuals  
211 were tested for autocorrelation, normal distribution and any remaining patterns (same procedure applied  
212 in all regression analyses). A logistic regression analysis was also applied to test the relationship between  
213 DNA concentration and binomial detection data assessing the change of detection probability with DNA

214 concentrations. For the mesocosm and field samples, the relationship between (i) the population density  
215 established by traditional sampling methods and (ii) the Ct values and detection probability (calculated as  
216 the fraction of technical replicates that resulted in positive detection) of eDNA measurements were  
217 examined in a linear regression model. Differences in sample volumes between locations (due to turbidity)  
218 were accounted for by including sample volume as a predictor in regression models, and log-log and  
219 untransformed models were compared using AIC. Further, Ct and detection probability of different  
220 sampling methods were compared using ANOVA analyses followed by Tukey's HSD post-hoc tests, and t-  
221 tests or nested ANOVA's (lotic and lentic systems, where only two methods were compared). Prior to  
222 ANOVAs, heteroscedasticity was evaluated, and data transformed if necessary. Finally, the co-existence  
223 of *A. pallipes* with signal crayfish and crayfish plague was tested in regression models using detection  
224 probability of all three species. All described statistical analyses were performed using R version 3.4.1 (R  
225 Core Team (2017).

226

## 227 **Results**

### 228 ***Assay development and in-silico and in-vitro validation***

229 Primers and probe were highly species-specific as *in-silico* and *in-vitro* tests did not reveal any matches  
230 with non-target species (Table S3). Analysis of the standard curve (Fig. 1A) revealed a strong dependency  
231 of Ct values on DNA concentrations ( $y=-1.73x+20.8$ ,  $p<0.001$ ,  $r^2= 0.993$ ). Likewise, the detection  
232 probability was also positively related to DNA concentration in the sample ( $y=-0.18x+1.39$ ,  $p=0.0016$ ,  
233  $r^2=0.804$ ; Fig. 1B), highlighting the possibility of a quantifiable assay being developed. Method sensitivity  
234 analyses revealed a LOD of  $7.9 \times 10^{-5}$ ng and a LOQ of  $7.9 \times 10^{-4}$ ng crayfish DNA extract per  $\mu\text{L}^{-1}$ .

### 235 ***In-situ validation***

236 Populations of *A. pallipes* were found in five out of the six surveyed sites using traditional survey methods.  
237 eDNA-based detection indicates the presence of *A. pallipes* in all six sites, though the site with no visual  
238 *A. pallipes* sightings was characterised by a very low detection probability. The Ct values from the six river  
239 sites were converted into DNA concentrations using the calibration curve, which allowed us to compare  
240 the relationship between detection probability and DNA concentration in laboratory and field samples  
241 (Fig. 1B). Four out of the six field sites lay outside of the 95% confidence interval of the standard curve,  
242 indicating systematic differences between *in-vitro* validation and field samples. The relationship between  
243 estimated crayfish population size (estimated capture-mark-recapture methods) and detection  
244 probability of eDNA measurements (Fig. 1D) was significant, but only when water temperature was  
245 included ( $y=0.0118x_1-0.117x_2+1.77$ ;  $x_1$ =mean survey count,  $x_2$ =temperature,  $p=0.035$ ,  $r^2=0.82$ ). The  
246 relationship between Ct and estimated population size was marginally non-significant but showed a  
247 reasonable model fit (Fig. 1C;  $y=-0.00067\log(x)+3.76$ ,  $p=0.079$ ,  $r^2=0.47$ ). Differences in filtered sample  
248 volume did not significantly influence results.

#### 249 **Comparison of eDNA sampling methods**

250 In mesocosm experiments, sampling methodology had a significant impact on detection probability  
251 (ANOVA  $F_{(3,44)}=74.48$ ,  $p<0.001$ ). Pairwise comparisons revealed that detection probabilities of all three  
252 filtration-based methods (2 $\mu$ m, 0.22 $\mu$ m and 0.45 $\mu$ m) were comparable ( $p>0.05$ ) but differed significantly  
253 from the precipitation method ( $p<0.001$ , Fig. 2A). However, the  $p$ -value for the comparison between  
254 0.45 $\mu$ m and 2 $\mu$ m was marginal non-significant ( $p=0.051$ ). Similarly, methodologies also differed  
255 significantly in Ct (ANOVA  $F_{(3,178)}=90.1$ ,  $p<0.001$ ). However, in contrast to detection probability, pairwise  
256 tests indicated a difference between the 2 $\mu$ m filtration method and all the other approaches ( $p<0.001$ ;  
257 Fig. 2B; only samples with positive detection were included in the analysis).

258 *In-situ* comparisons of sampling methods in a lentic system were highly comparable to the mesocosm  
259 experiment (Fig. 3 A-B). The precipitation method showed a significantly lower detection probability (T-  
260 test,  $t=3.55$ ,  $df=75.37$ ,  $p<0.001$ ) and a significantly higher Ct ( $t=-2.46$ ,  $df=15.72$ ,  $p<0.05$ ) than the filtration-  
261 based method ( $0.22\mu\text{m}$ ). However, contrasting results were attained in lotic systems. Here, we assessed  
262 the method for both, *A. pallipes* and the crayfish plague (not present in mesocosms or ponds). The  
263 detection probability of crayfish plague mirrored findings from other systems showing significantly higher  
264 detection probabilities for the  $2\mu\text{m}$  filtration method (nested ANOVA;  $F_{(1,69)}=4.92$ ,  $p<0.05$ ; Fig. 3E). Ct  
265 values were not significantly different, but also indicated a better performance of the filtration-based  
266 method (Fig. 3F). However, the results for *A. pallipes* contrasted all other results. In lentic systems,  
267 precipitation resulted in a higher detection probability (nested ANOVA  $F_{(1,69)}=13.77$ ,  $p<0.001$ , Fig. 3C) and  
268 accordingly, lower Ct values (nested ANOVA;  $F_{(1,34)}=5.24$ ,  $p=0.028$ ; Fig. 3D). Consequently, filtration-based  
269 methods performed consistently better except in lentic systems where eDNA from *A. pallipes* was more  
270 reliably assessed with the precipitation method.

#### 271 **Field tests of species co-occurrence**

272 Finally, our joint assessment of white-clawed crayfish, signal crayfish and crayfish plague (Fig. 4)  
273 demonstrated that white-clawed crayfish occurrence was related to both other species (Fig. 4, B,C). Whilst  
274 univariate regressions were marginally non-significant (dependency of white-clawed crayfish on signal  
275 crayfish:  $p=0.063$ ; dependency of white-clawed crayfish on crayfish plague:  $p=0.051$ ), a multiple  
276 regression analysis revealed significant relationships ( $y = -23.8x_1 + 13.1x_2 - 3.8$ ,  $r^2=0.73$ ,  $p=0.016$ ;  $y$ ,  $x_1$  and  
277  $x_2$  represent detection probabilities of white-clawed crayfish, signal crayfish and crayfish plague,  
278 respectively). Unsurprisingly, white-clawed crayfish was negatively impacted by the presence of signal  
279 crayfish (Fig. 4B), yet contrary to expectation they were shown to be positively related with increase in

280 detection of crayfish plague (Fig. 4C). There was no apparent correlation between signal crayfish and  
281 plague (Fig. 4D).

282

## 283 **Discussion**

284 Native crayfish species across Europe are threatened by invasive competitors and the jointly introduced  
285 crayfish plague, resulting in a downward trajectory of native species' abundance and distribution (Holdich  
286 et al., 2009). In this study, we present a novel assay for the detection of *A. pallipes*, a flagship conservation  
287 species in Western Europe. In rigorous *in-vitro* and *in-situ* tests, we evaluated the reliability of our assay  
288 under various environmental conditions. Further, we applied our assay together with established eDNA-  
289 based methods to assess the drivers of *A. pallipes* occurrence. Overall, we were able to demonstrate that  
290 our approach can not only be used for simple presence/absence surveys but also has the potential to  
291 reveal complex species interactions. However, our results also highlight that such applications are only  
292 meaningful after thorough method testing and validation.

293 Field comparisons indicated a higher sensitivity of the eDNA assay compared to traditional surveys, which  
294 only resulted in positive detection in five out of six sites. Whilst higher sensitivity is frequently reported  
295 for eDNA assays (Dejean et al., 2012; Jerde et al., 2011; Smart et al., 2015), such results should be  
296 interpreted with caution as eDNA-based approaches are associated with a risk of providing false positive  
297 results (Furlan et al., 2016). One possible cause of false positives is the downstream transport eDNA within  
298 river networks (Pont et al., 2018). Moreover, false positives may result from historic eDNA, which is still  
299 present after the extinction or emigration of the target species (Turner et al., 2015). In our case, this  
300 represents a valid hypothesis as all field sites were populated by *A. pallipes* a year before our field surveys  
301 (C. Mauvisseau, personal communication). Consequently, it remains inconclusive whether the developed

302 eDNA approach truly has a higher sensitivity (i.e. false negative of torching method) or, in fact, *A. pallipes*  
303 was not present at the field site in question.

304 Further, an important component of our method validation was the comparison of different field sampling  
305 approaches. Precipitation and filtration protocols to concentrate eDNA from the environment have  
306 already been compared in a number of studies (Deiner et al., 2015; Spens et al., 2017). Most investigators  
307 endorse filtration approaches (Hinlo et al., 2017b; Spens et al., 2017; Vörös et al., 2017), but optimal pore  
308 size may differ between species (Spens et al., 2017). Moreover, method choice can also be environment-  
309 dependant. For example, Eichmiller, et al. (2016) indicated filtration as the optimal eDNA-based method  
310 for surveying the common carp, *Cyprinus carpio*. In contrast, Minamoto et al. (2016) highlighted  
311 precipitation performed better – a result likely brought about by variations in the environment across  
312 both studies. In our controlled mesocosm comparison, we found that a 2 µm filtration approach  
313 outperformed precipitation and the other filtration methods tested. However, field comparisons revealed  
314 contrasting results, again likely brought about by the different environments surveyed (Fig. 3). In this  
315 scenario precipitation outperformed filtration (2 µm) in the lotic system.

316 One possible explanation for our divergent findings across different habitats is that target eDNA particles  
317 differ in these environments. eDNA is exposed to continuous degradation through biotic (e.g. bacteria)  
318 and abiotic (e.g. UV) factors (Strickler et al., 2015) and these degradation processes can affect eDNA  
319 particle size distributions. Filtration has the advantage to collate eDNA from larger water volumes but is  
320 linked to the risk of losing particles which are below filter pore sizes. Hence, the habitat-specific  
321 differences in our method comparisons may be explained by the specific degradation processes within  
322 the investigated river systems. A decrease of average eDNA particle size below the filter pore size would  
323 substantially decrease detection probability of filtration approaches and explain our findings.

324 An alternative explanation for our results is linked to inhibition of eDNA amplification. Inhibitor  
325 compounds (that interfere with qPCR processes), have been shown to affect target DNA amplification in  
326 a non-linear way (Goldberg et al., 2016). If inhibitor concentration is low, amplification will not be strongly  
327 impacted. However, if concentrations surpass a certain threshold, inhibitors may suppress the  
328 amplification of even high concentrations of target eDNA (Mauvisseau et al., 2019a). Sampling methods  
329 that differ in their water collection volumes and in the amount of concentrated target eDNA, will also  
330 concentrate inhibitors to different degrees (Fig. 5). Consequently, sampling methods that reach higher  
331 target eDNA concentrations may show a lower overall performance due to the non-linear relationship  
332 between inhibitor concentrations and DNA amplification. This scenario will occur when inhibitors are  
333 present in high concentrations and efficiently concentrated. Therefore, different ratios between target  
334 eDNA and inhibitors in different environments can cause a shift in the relative performance of sampling  
335 methods across habitats (Fig. 5). In our case, we did not include tests for inhibition, which include the  
336 addition of synthetic DNA to qPCR reactions (i.e. failure to detect synthetic DNA indicates inhibition;  
337 (Goldberg et al., 2016; Mauvisseau et al., 2019a). However, we recommend that such inhibition tests  
338 should be included in future field method comparisons.

339 Both inhibition and different target-eDNA size distributions might also explain differences in method  
340 comparisons between species in the same environment as observed for white-clawed crayfish and  
341 crayfish plague in lotic habitats (Fig. 3). A fundamental distinction between the two species is that *A. astaci*  
342 depends for its proliferation on the frequent and abundant release of encapsulated spores (~8  $\mu\text{m}$  in  
343 diameter). It seems likely that these spores, which are designed for transport along large distances, will  
344 show lower sensitivity to degradation than *A. pallipes* DNA, which potentially could explain our species-  
345 specific results.



346 Finally, we demonstrated that our approach can also be used for investigating complex ecological  
347 relationships determining the distribution of endangered species. Our simultaneous assessments of  
348 white-clawed crayfish, signal crayfish and crayfish plague revealed a negative impact of signal crayfish on  
349 *A. pallipes* (Fig. 4). Such negative impacts of invasive competitors on native crayfish species have been  
350 frequently highlighted before (Holdich et al., 2009) and demonstrate the applicability of our approach.  
351 Interestingly, however, we illustrated a positive relationship between white-clawed crayfish and crayfish  
352 plague, which went against our expectation. Such co-occurrence might result from the one-time nature  
353 of our sampling approach and reflect a disease outbreak within the crayfish population, which most  
354 probably would result in local extinction (Strand et al., 2019). However, recent discoveries have also  
355 indicated the potential of plague resistance in some white-clawed crayfish strains (Martín-Torrijos et al.,  
356 2017). Such increased disease tolerance might facilitate a permanent co-existence of pathogen and host.  
357 Consequently, further in-depth monitoring of species dynamics together with genetic profiling and  
358 disease susceptibility tests should be a primary objective of future conservation planning.

359

## 360 **Conclusions**

361 Currently, many species-specific eDNA assays only cover *in-silico*, *in-vitro* and sometimes basic *in-situ*  
362 validation steps (Baldigo et al., 2017; Dickie et al., 2018; Egan et al., 2017; Lacoursière-Roussel et al., 2016).  
363 Already published *A. pallipes* eDNA assays have shown some promising first results but yet need to go  
364 through the required thorough level of *in-situ* evaluation (Atkinson et al., 2019; Robinson et al., 2018).  
365 Here we illustrate that sampling methods can differ strongly in performance and recommend rigorous  
366 testing of eDNA assays to optimise sampling strategies. However, our contrasting results of method  
367 comparisons across habitats and species highlight that there might not be something like a universal

368 'optimal sampling method', but that adjustments to account for local conditions are required. The  
369 resulting higher method reliability increases the applicability of eDNA assays and paves the way for more  
370 detailed ecological studies to improve species management and conservation.

371

## 372 **Acknowledgments**

373 For assistance with sample collection we would like to thank Holly Thompson and Jacob Ball, Jack  
374 Greenhalgh, Isabelle Parot and Antoine Monier. We would also like to thank the Alex Lumsdon and the  
375 Environment Agency, Angus Menzies and Dorset Wildlife Trust for their assistance with sample collection  
376 and funding. For providing crayfish DNA samples: Catherine Souty-Grosset, Sina Tönges and Frank Lyko;  
377 and DNA of *A. astaci*: Jenny Makkonen and Japo Jussila. Funding was provided by SureScreen Scientifics,  
378 UK.

## 379 **Author Contributions**

380 C.T. and M.S. designed the experiment and methodology, C.T., Q.M., J.N. and C.M. collected field  
381 samples, C.T., and Q.M. performed extraction and PCR, C.T., A.B. and M.B. analysed the data. The  
382 manuscript was written by C.T., M.S. and A.B. and reviewed by all authors.

## 383 **Competing interest**

384 The authors declare no competing interests.

## 385 **References**

- 386 Atkinson, S., Carlsson, J.E.L., Ball, B., Kelly-Quinn, M., Carlsson, J., 2019. eDNA assay for  
387 Austropotamobius pallipes Field validation of an eDNA assay for the endangered white-clawed  
388 crayfish *Austropotamobius pallipes*. bioRxiv. <https://doi.org/10.1101/562710>
- 389 Baldigo, B.P., Sporn, L.A., George, S.D., Ball, J.A., 2017. Efficacy of Environmental DNA to Detect and  
390 Quantify Brook Trout Populations in Headwater Streams of the Adirondack Mountains, New York.  
391 Trans. Am. Fish. Soc. 146, 99–111. <https://doi.org/10.1080/00028487.2016.1243578>
- 392 Biggs, J., Ewald, N., Valentini, A., Gaboriaud, C., Dejean, T., Griffiths, R.A., Foster, J., Wilkinson, J.W.,  
393 Arnell, A., Brotherton, P., Williams, P., Dunn, F., 2015. Using eDNA to develop a national citizen  
394 science-based monitoring programme for the great crested newt (*Triturus cristatus*). Biol. Conserv.  
395 183, 19–28. <https://doi.org/10.1016/J.BIOCON.2014.11.029>
- 396 Biggs, J., Ewald, N., Valentini, A., Gaboriaud, C., Griffiths, R., Foster, J., Wilkinson, J., Arnett, A., Williams,  
397 P., Dunn, F., 2014. Analytical and methodological development for improved surveillance of the  
398 Great Crested Newt Appendix 5 . Technical advice note for field and laboratory sampling of great  
399 crested newt (*Triturus cristatus*) environmental DNA. Freshw. Habitats Trust. Oxford.
- 400 Bustin, S.A., Benes, V., Garson, J.A., Hellems, J., Huggett, J., Kubista, M., Mueller, R., Nolan, T., Pfaffl,  
401 M.W., Shipley, G.L., Vandesompele, J., Wittwer, C.T., 2009. The MIQE Guidelines: Minimum  
402 Information for Publication of Quantitative Real-Time PCR Experiments. Clin. Chem. 55, 611–622.  
403 <https://doi.org/10.1373/clinchem.2008.112797>
- 404 Bylemans, J., Furlan, E.M., Gleeson, D.M., Hardy, C.M., Duncan, R.P., 2018. Does Size Matter? An  
405 Experimental Evaluation of the Relative Abundance and Decay Rates of Aquatic Environmental  
406 DNA. Environ. Sci. Technol. 52, 6408–6416. <https://doi.org/10.1021/acs.est.8b01071>
- 407 Deiner, K., Walser, J.-C., Mächler, E., Altermatt, F., 2015. Choice of capture and extraction methods  
408 affect detection of freshwater biodiversity from environmental DNA. Biol. Conserv. 183, 53–63.  
409 <https://doi.org/10.1016/J.BIOCON.2014.11.018>
- 410 Dejean, T., Valentini, A., Miquel, C., Taberlet, P., Bellemain, E., Miaud, C., 2012. Improved detection of  
411 an alien invasive species through environmental DNA barcoding: the example of the American  
412 bullfrog *Lithobates catesbeianus*. J. Appl. Ecol. 49, 953–959. <https://doi.org/10.1111/j.1365-2664.2012.02171.x>
- 414 Dickie, I.A., Boyer, S., Buckley, H.L., Duncan, R.P., Gardner, P.P., Hogg, I.D., Holdaway, R.J., Lear, G.,  
415 Makiola, A., Morales, S.E., Powell, J.R., Weaver, L., 2018. Towards robust and repeatable sampling  
416 methods in eDNA-based studies. Mol. Ecol. Resour. 18, 940–952. <https://doi.org/10.1111/1755-0998.12907>
- 418 Egan, D., Carlsson, J.J.E.L.L., Igoe, F., Carlsson, J.J.E.L.L., Collins, P.C., Farrell, E.D., Egan, D., Collins, P.C.,  
419 Igoe, F., Farrell, E.D., 2017. A qPCR MGB probe based eDNA assay for European freshwater pearl  
420 mussel (*Margaritifera margaritifera* L.). Aquat. Conserv. Mar. Freshw. Ecosyst. 27, 1341–1344.  
421 <https://doi.org/10.1002/aqc.2788>
- 422 Ficetola, G.F., Miaud, C., Pompanon, F., Taberlet, P., 2008. Species detection using environmental DNA  
423 from water samples. Biol. Lett. 4, 423–5. <https://doi.org/10.1098/rsbl.2008.0118>

- 424 Folmer, O., BLACK, M., HOEH, W., Lutz, R., Vrijenhoek, R., 1994. DNA primers for amplification of  
425 mitochondrial cytochrome c oxidase subunit I from diverse metazoan invertebrates. *Mol. Mar. Biol.*  
426 *Biotechnol.* 3, 294–299. <https://doi.org/10.1371/journal.pone.0013102>
- 427 Füreder, L., Gherardi, F., Holdich, D., Reynolds, J., Sibley, P., Souty-Grosset, C., 2010. *Austropotamobius*  
428 *pallipes*. The IUCN Red List of Threatened Species 2010: e.T2430A9438817 [WWW Document]. URL  
429 <http://www.iucnredlist.org/details/2430/0> (accessed 2.9.18).
- 430 Furlan, E.M., Gleeson, D., Hardy, C.M., Duncan, R.P., 2016. A framework for estimating the sensitivity of  
431 eDNA surveys. *Mol. Ecol. Resour.* 16. <https://doi.org/10.1111/1755-0998.12483>
- 432 Geerts, A.N., Boets, P., Van den Heede, S., Goethals, P., Van der heyden, C., 2018. A search for  
433 standardized protocols to detect alien invasive crayfish based on environmental DNA (eDNA): A lab  
434 and field evaluation. *Ecol. Indic.* 84, 564–572. <https://doi.org/10.1016/j.ecolind.2017.08.068>
- 435 Gladman, Z.F., Yeomans, W.E., Adams, C.E., Bean, C.W., McColl, D., Olszewska, J.P., McGillivray, C.W.,  
436 McCluskey, R., 2010. Detecting North American signal crayfish (*Pacifastacus leniusculus*) in riffles.  
437 *Aquat. Conserv. Mar. Freshw. Ecosyst.* 20, 588–594. <https://doi.org/10.1002/aqc.1130>
- 438 Goldberg, C.S., Turner, C.R., Deiner, K., Klymus, K.E., Thomsen, P.F., Murphy, M.A., Spear, S.F., McKee,  
439 A., Oyler-McCance, S.J., Cornman, R.S., Laramie, M.B., Mahon, A.R., Lance, R.F., Pilliod, D.S.,  
440 Strickler, K.M., Waits, L.P., Fremier, A.K., Takahara, T., Herder, J.E., Taberlet, P., 2016. Critical  
441 considerations for the application of environmental DNA methods to detect aquatic species.  
442 *Methods Ecol. Evol.* 7, 1299–1307. <https://doi.org/10.1111/2041-210X.12595>
- 443 Harper, L.R., Buxton, A.S., Rees, H.C., Bruce, K., Brys, R., Halfmaerten, D., Read, D.S., Watson, H. V.,  
444 Sayer, C.D., Jones, E.P., Priestley, V., Mächler, E., Múrria, C., Garcés-Pastor, S., Medupin, C.,  
445 Burgess, K., Benson, G., Boonham, N., Griffiths, R.A., Lawson Handley, L., Hänfling, B., 2019.  
446 Prospects and challenges of environmental DNA (eDNA) monitoring in freshwater ponds.  
447 *Hydrobiologia* 826, 25–41. <https://doi.org/10.1007/s10750-018-3750-5>
- 448 Hinlo, R., Furlan, E., Sutor, L., Gleeson, D., 2017a. Environmental DNA monitoring and management of  
449 invasive fish: comparison of eDNA and fyke netting. *Manag. Biol. Invasions* 8, 89–100.  
450 <https://doi.org/10.3391/mbi.2017.8.1.09>
- 451 Hinlo, R., Gleeson, D., Lintermans, M., Furlan, E., 2017b. Methods to maximise recovery of  
452 environmental DNA from water samples. *PLoS One* 12, e0179251.  
453 <https://doi.org/10.1371/journal.pone.0179251>
- 454 Holdich, D.M., Reeve, I.A.N.D., 1991. Distribution of freshwater crayfish in the British Isles, with  
455 particular reference to crayfish plague, alien introductions and water quality. *Aquat. Conserv. Mar.*  
456 *Freshw. Ecosyst.* 1, 139–158. <https://doi.org/10.1002/aqc.3270010204>
- 457 Holdich, D.M.M., Reynolds, J.D.D., Souty-Grosset, C., Sibley, P.J.J., 2009. A review of the ever increasing  
458 threat to European crayfish from non-indigenous crayfish species. *Knowl. Manag. Aquat. Ecosyst.*  
459 11. <https://doi.org/10.1051/kmae/2009025>
- 460 Huver, J.R., Koprivnikar, J., Johnson, P.T.J., Whyard, S., 2015. Development and application of an eDNA  
461 method to detect and quantify a pathogenic parasite in aquatic ecosystems. *Ecol. Appl.*  
462 <https://doi.org/10.2307/24432104>

- 463 Jerde, C.L., Chadderton, W.L., Mahon, A.R., Renshaw, M.A., Corush, J., Budny, M.L., Mysorekar, S.,  
464 Lodge, D.M., 2013. Detection of Asian carp DNA as part of a Great Lakes basin-wide surveillance  
465 program. *Can. J. Fish. Aquat. Sci.* 70, 522–526. <https://doi.org/10.1139/cjfas-2012-0478>
- 466 Jerde, C.L., Mahon, A.R., Chadderton, W.L., Lodge, D.M., 2011. “Sight-unseen” detection of rare aquatic  
467 species using environmental DNA. *Conserv. Lett.* 4, 150–157. [https://doi.org/10.1111/j.1755-](https://doi.org/10.1111/j.1755-263X.2010.00158.x)  
468 [263X.2010.00158.x](https://doi.org/10.1111/j.1755-263X.2010.00158.x)
- 469 Kearse, M., Moir, R., Wilson, A., Stones-Havas, S., Cheung, M., Sturrock, S., Buxton, S., Cooper, A.,  
470 Markowitz, S., Duran, C., Thierer, T., Ashton, B., Meintjes, P., Drummond, A., 2012. Geneious Basic:  
471 an integrated and extendable desktop software platform for the organization and analysis of  
472 sequence data. *Bioinformatics* 28, 1647–9. <https://doi.org/10.1093/bioinformatics/bts199>
- 473 Lacoursière-Roussel, A., Côté, G., Leclerc, V., Bernatchez, L., 2016. Quantifying relative fish abundance  
474 with eDNA: a promising tool for fisheries management. *J. Appl. Ecol.* 53, 1148–1157.  
475 <https://doi.org/10.1111/1365-2664.12598>
- 476 Lincoln, F. C. 1930. Calculating waterfowl abundances on the basis of banding returns. U.S. Department  
477 of Agriculture, Circular 118.
- 478 MacDonald, A.J., Sarre, S.D., 2017. A framework for developing and validating taxon-specific primers for  
479 specimen identification from environmental DNA. *Mol. Ecol. Resour.* 17, 708–720.  
480 <https://doi.org/10.1111/1755-0998.12618>
- 481 Mächler, E., Deiner, K., Spahn, F., Altermatt, F., 2016. Fishing in the Water: Effect of Sampled Water  
482 Volume on Environmental DNA-Based Detection of Macroinvertebrates. *Environ. Sci. Technol.* 50,  
483 305–312. <https://doi.org/10.1021/acs.est.5b04188>
- 484 Martín-Torrijos, L., Campos Llach, M., Pou-Rovira, Q., Diéguez-Urbeondo, J., 2017. Resistance to the  
485 crayfish plague, *Aphanomyces astaci* (Oomycota) in the endangered freshwater crayfish species,  
486 *Austropotamobius pallipes*. *PLoS One* 12, e0181226.  
487 <https://doi.org/10.1371/journal.pone.0181226>
- 488 Mauvisseau, Q., Coignet, A., Delaunay, C., Pinet, F., Bouchon, D., Souty-Grosset, C., 2018. Environmental  
489 DNA as an efficient tool for detecting invasive crayfishes in freshwater ponds. *Hydrobiologia* 805,  
490 163–175. <https://doi.org/10.1007/s10750-017-3288-y>
- 491 Mauvisseau, Q., Davy-Bowker, J., Bulling, M., Brys, R., Neyrinck, S., Troth, C., Sweet, M., 2019a.  
492 Improving detection capabilities of a critically endangered freshwater invertebrate with  
493 environmental DNA using digital droplet PCR. *bioRxiv* 661447. <https://doi.org/10.1101/661447>
- 494 Mauvisseau, Q., Tönges, S., Andriantsoa, R., Lyko, F., Sweet, M., 2019b. Early detection of an emerging  
495 invasive species: eDNA monitoring of a parthenogenetic crayfish in freshwater systems,  
496 *Management of Biological Invasions*.
- 497 Minamoto, T., Naka, T., Moji, K., Maruyama, A., 2016. Techniques for the practical collection of  
498 environmental DNA: filter selection, preservation, and extraction. *Limnology* 17, 23–32.  
499 <https://doi.org/10.1007/s10201-015-0457-4>
- 500 Pont, D., Rocle, M., Valentini, A., Civade, R., Jean, P., Maire, A., Roset, N., Schabuss, M., Zornig, H.,  
501 Dejean, T., 2018. Environmental DNA reveals quantitative patterns of fish biodiversity in large

- 502 rivers despite its downstream transportation. *Sci. Rep.* 8, 10361. [https://doi.org/10.1038/s41598-](https://doi.org/10.1038/s41598-018-28424-8)  
503 018-28424-8
- 504 Petersen, C. G. J. 1896. The yearly immigration of young plaice into the Limfjord from the German Sea.  
505 Report of the Danish Biological Station 1895 6:1–77.
- 506 R Core Team (2017). R: A language and environment for statistical computing. R Foundation for  
507 Statistical Computing, Vienna, A.U. <https://www.R.org/>.
- 508 Rees, H.C., Maddison, B.C., Middleditch, D.J., Patmore, J.R.M., Gough, K.C., 2014. REVIEW: The detection  
509 of aquatic animal species using environmental DNA - a review of eDNA as a survey tool in ecology.  
510 *J. Appl. Ecol.* 51, 1450–1459. <https://doi.org/10.1111/1365-2664.12306>
- 511 Robinson, C.V., Uren Webster, T.M., Cable, J., James, J., Consuegra, S., 2018. Simultaneous detection of  
512 invasive signal crayfish, endangered white-clawed crayfish and the crayfish plague pathogen using  
513 environmental DNA. *Biol. Conserv.* 222, 241–252. <https://doi.org/10.1016/j.biocon.2018.04.009>
- 514 Smart, A.S., Tingley, R., Weeks, A.R., Van Rooyen, A.R., McCarthy, M.A., 2015. Environmental DNA  
515 sampling is more sensitive than a traditional survey technique for detecting an aquatic invader.  
516 *Ecol. Appl.* 25, 1944–1952. <https://doi.org/10.1890/14-1751.1>
- 517 Spear, S.F., Groves, J.D., Williams, L.A., Waits, L.P., 2015. Using environmental DNA methods to improve  
518 detectability in a hellbender (*Cryptobranchus alleganiensis*) monitoring program. *Biol. Conserv.*  
519 183, 38–45. <https://doi.org/10.1016/j.biocon.2014.11.016>
- 520 Spens, J., Evans, A.R., Halfmaerten, D., Knudsen, S.W., Sengupta, M.E., Mak, S.S.T., Sigsgaard, E.E.,  
521 Hellström, M., 2017. Comparison of capture and storage methods for aqueous microbial eDNA  
522 using an optimized extraction protocol: advantage of enclosed filter. *Methods Ecol. Evol.* 8, 635–  
523 645. <https://doi.org/10.1111/2041-210X.12683>
- 524 Strand, D.A., Johnsen, S.I., Rusch, J.C., Agersnap, S., Larsen, W.B., Knudsen, S.W., Møller, P.R., Vrålstad,  
525 T., 2019. Monitoring a Norwegian freshwater crayfish tragedy: eDNA snapshots of invasion,  
526 infection and extinction. *J. Appl. Ecol.* 56, 1365-2664.13404. [https://doi.org/10.1111/1365-](https://doi.org/10.1111/1365-2664.13404)  
527 2664.13404
- 528 Strand, D.A., Jussila, J., Johnsen, S.I., Viljamaa-Dirks, S., Edsman, L., Wiik-Nielsen, J., Viljugrein, H.,  
529 Engdahl, F., Vrålstad, T., 2014. Detection of crayfish plague spores in large freshwater systems. *J.*  
530 *Appl. Ecol.* 51, 544–553. <https://doi.org/10.1111/1365-2664.12218>
- 531 Strickler, K.M., Fremier, A.K., Goldberg, C.S., 2015. Quantifying effects of UV-B, temperature, and pH on  
532 eDNA degradation in aquatic microcosms. *Biol. Conserv.* 183, 85–92.  
533 <https://doi.org/10.1016/J.BIOCON.2014.11.038>
- 534 Takahara, T., Minamoto, T., Yamanaka, H., Doi, H., Kawabata, Z., 2012. Estimation of Fish Biomass Using  
535 Environmental DNA. *PLoS One* 7, e35868. <https://doi.org/10.1371/journal.pone.0035868>
- 536 Tréguier, A., Paillisson, J.-M., Dejean, T., Valentini, A., Schlaepfer, M.A., Roussel, J.-M., 2014.  
537 Environmental DNA surveillance for invertebrate species: advantages and technical limitations to  
538 detect invasive crayfish *Procambarus clarkii* in freshwater ponds. *J. Appl. Ecol.* 51, 871–879.  
539 <https://doi.org/10.1111/1365-2664.12262>

- 540 Turner, C.R., Uy, K.L., Everhart, R.C., 2015. Fish environmental DNA is more concentrated in aquatic  
541 sediments than surface water. *Biol. Conserv.* 183, 93–102.  
542 <https://doi.org/10.1016/j.biocon.2014.11.017>
- 543 Vörös, J., Márton, O., Schmidt, B.R., Gál, J.T., Jelić, D., 2017. Surveying Europe’s Only Cave-Dwelling  
544 Chordate Species (*Proteus anguinus*) Using Environmental DNA. *PLoS One* 12, e0170945.  
545 <https://doi.org/10.1371/journal.pone.0170945>
- 546

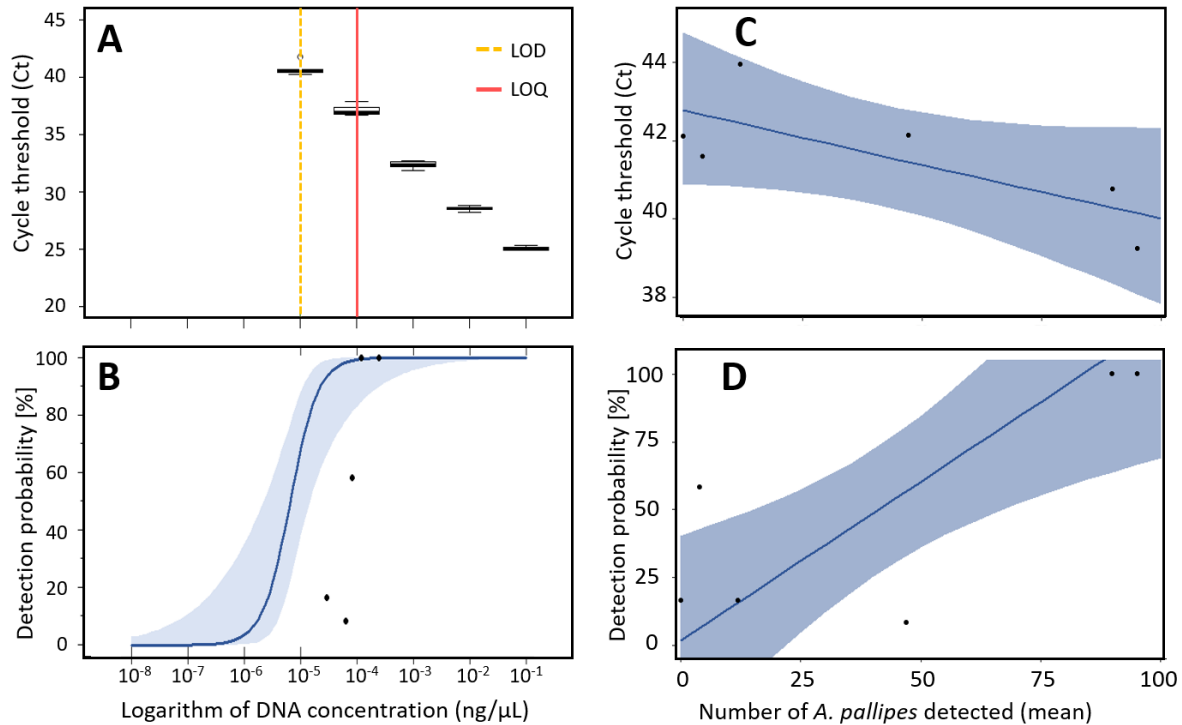

547

548 **Figure 1. (A)** Relationship between cycle threshold (Ct) and DNA concentration from *A. pallipes* qPCR  
549 calibration curve. Limit of detection (LOD) and limit of quantification (LOQ) are illustrated by vertical lines  
550 (dashed-yellow and red respectively). **(B)** Change in detection probability with increasing DNA  
551 concentration and calibration curve data. **(C)** Relationship between Ct values and *A. pallipes* population  
552 monitored using traditional method. **(D)** Relationship between detection probability of eDNA and  
553 traditionally evaluated crayfish population sizes. The blue line and the light-blue shaded area reflect the  
554 results of a logit regression and its 95% confidence interval, respectively. The black points represent data  
555 from the *in-situ* or *ex-situ* validation experiment. Four out of six data points were outside the established  
556 confidence interval in **(B)**, indicating discrepancies between field and laboratory-based data sets.

557



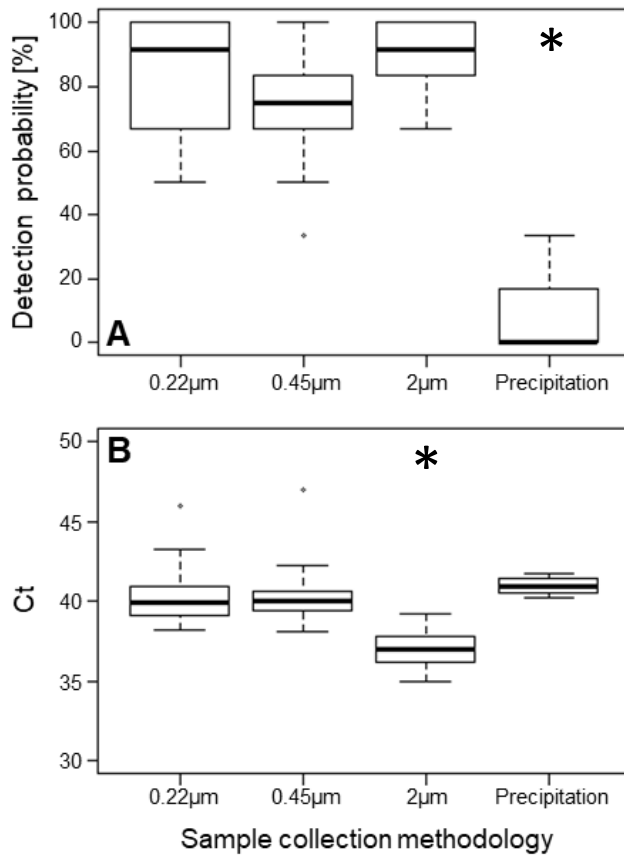

558  
559 **Figure 2.** Comparison of the detection probability (**A**) and Ct values (**B**) of *A. pallipes* using different eDNA  
560 sampling methods (0.22µm filtration, 0.45µm filtration, 2µm filtration and precipitation) in a controlled  
561 mesocosm experiment (\* indicates statistical significance).

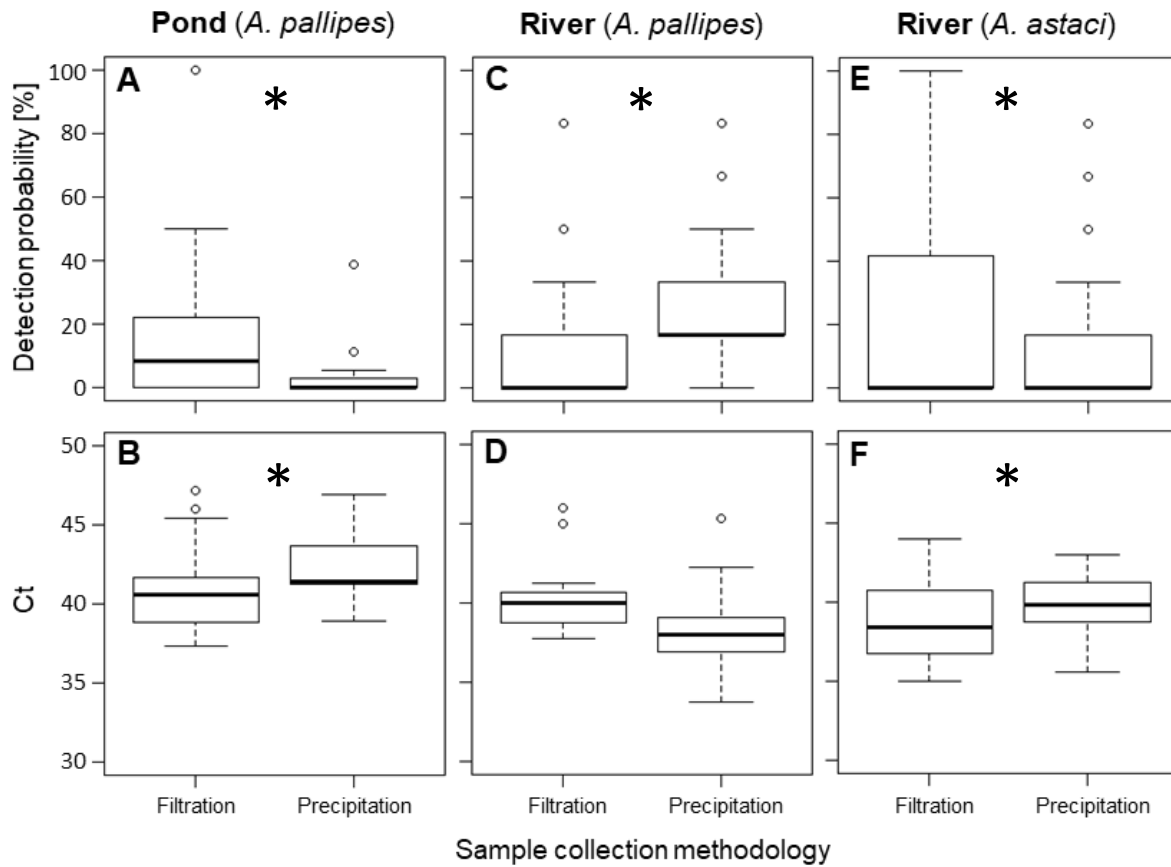

562

563

564

565

566

**Figure 3.** Comparison of the detection probability (**A, C, E**) and Ct values (**B, D, F**) of different eDNA sampling methods (filtration and precipitation) for *A. pallipes* in a lentic system (**Pond, A-B**) (filter pore size 0.22  $\mu\text{m}$ ) and for both *A. pallipes* (**River, C-D**) and *A. astaci* (**River, E-F**) in the same lotic system (filter pore size 2  $\mu\text{m}$ ) (\* in panels signifies significant differences between pairwise method).

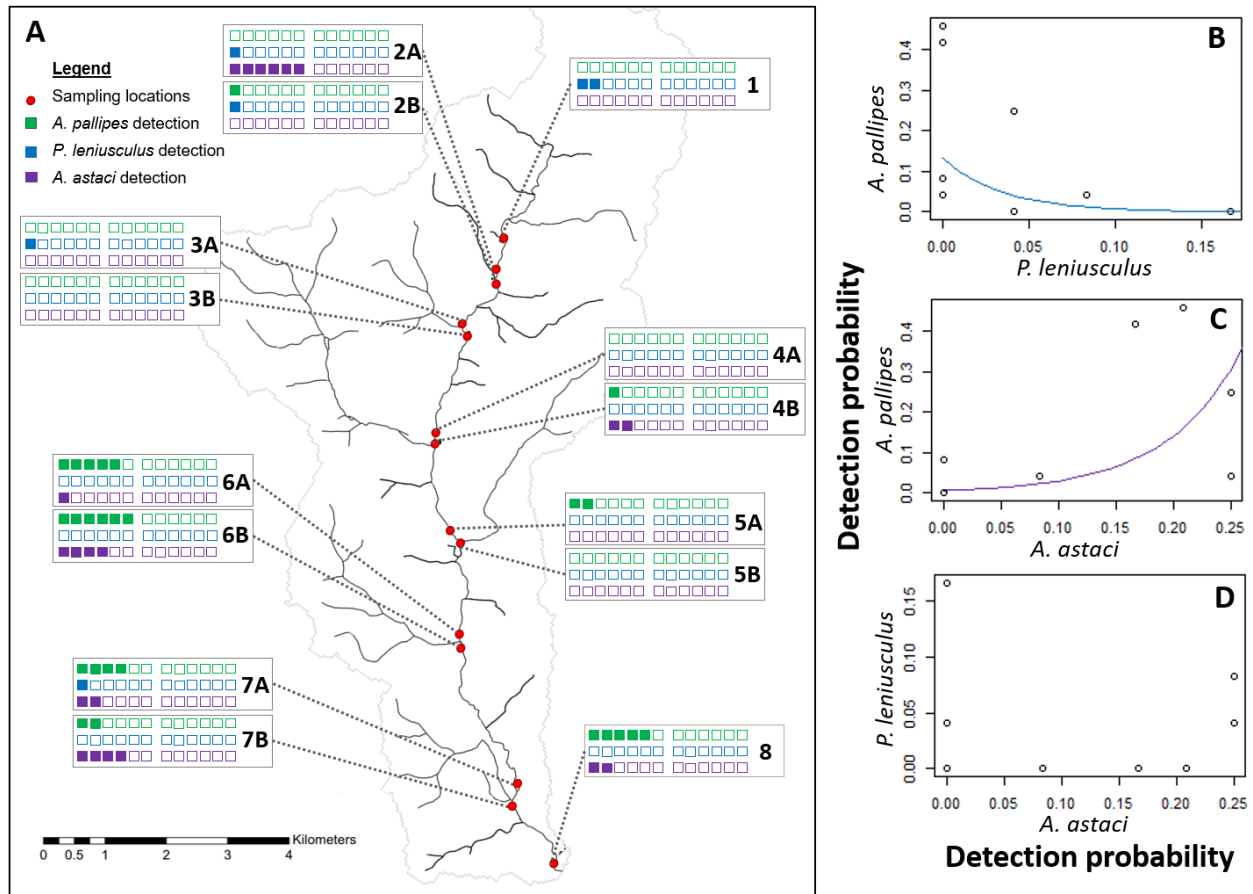

567  
568 **Figure 4. (A)** Detection of eDNA from *A. pallipes* (green squares), *P. leniusculus* (blue squares) and *A. astaci*  
569 (*A. astaci*) (purple squares) in a river catchment in Derbyshire. Eight locations were sampled and are represented by  
570 red dots. The empty squares represent the negative qPCR replicates. **(B)** Indicates the relationship  
571 between the detection probability of *A. pallipes* and detection probability of *P. leniusculus*. **(C)** The  
572 relationship between the detection probability of *A. pallipes* and detection probability of *A. astaci*. **(D)**  
573 The relationship between the detection probability of *P. leniusculus* and detection probability of *A. astaci*.

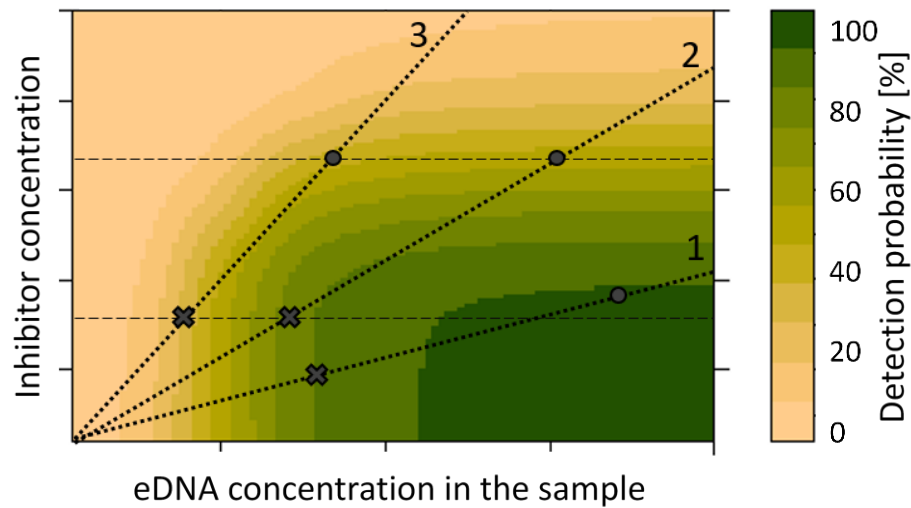

574  
575 **Figure 5.** Schematic of the co-dependency of detection probability on target eDNA and inhibitors  
576 concentrations in water samples. Detection probability increases with eDNA concentration and decreases  
577 with inhibitor concentrations but is low when both variables are high. Each water body is characterised  
578 by a certain ratio between inhibitor and target eDNA concentrations represented by black dotted lines (**1-**  
579 **3**). A change in sampling methods accompanied by a change in the sampled water volume will result in  
580 different concentrations of target eDNA and inhibitors in the sample and in shifts along dotted lines (**grey**  
581 **crosses and dots**). An increase in sampled water volume will therefore in some water bodies increase  
582 (Line 1) and in other decrease (Line 2) detection probability. The same is true when different eDNA assays  
583 in the same water body are considered. While eDNA concentrations of two targets may differ, inhibitor  
584 concentrations will be the same. Consequently, samples with the same water volume will have the same  
585 inhibitor concentrations (horizontal dashed lines). Nevertheless, changes in sampling volume and method  
586 can result in increased detection probability for one target (Line 3) but not for the other (Line 2).
